# Supplementary material for: Marker-trait associations in two-rowed spring barley accessions from Kazakhstan and the USA
Source: PLoS One. 2018 Oct 11;13(10):e0205421. doi: 10.1371/journal.pone.0205421 (PMC6181366; doi:10.1371/journal.pone.0205421)
Supplement: S4 Table — (XLS) [file pone.0205421.s010.xls]

## Sheet: Лист1
		HT	SMT	PH	TGW	NKS	PL	RIL	YM2
	Origin	5.279***	118.264***	59.017***	110.694***	16.386***	143.265***	10.886***	24.703***
	Region	10544.542***	7759.963***	6452.997***	3139.326***	224.105***	1796.373***	196.023***	4967.371***
	Year	1644.862***	618.850***	2388.156***	398.513***	403.783***	704.115***	335.840***	543.923***
	Origin:Region	7.867***	662.937***	17.784***	13.820***	5.671***	10.503***	3.561***	6.769***
	Origin:Year	4.369***	9.767***	4.581***	7.879***	2.475***	6.718***	9.230***	7.422***
	Region:Year	633.060***	374.009***	725.415***	112.831***	77.958***	205.298***	155.608***	228.166***
	Origin:Region:Year	7.352***	7.376***	6.288***	7.099***	2.529***	3.320***	3.411***	7.610***
	*** - P < 0.001
